# Supplementary material for: Improvements in Quality of Life and Thyroid Parameters in Hypothyroid Patients on Ethanol-Free Formula of Liquid Levothyroxine Therapy in Comparison to Tablet LT4 Form: An Observational Study
Source: MDPI journal article supplement (doi:10.3390/jcm10225233), 2021-11-10
Supplement: s1 [file s1]

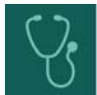

## SUPPLEMENTARY MATERIAL

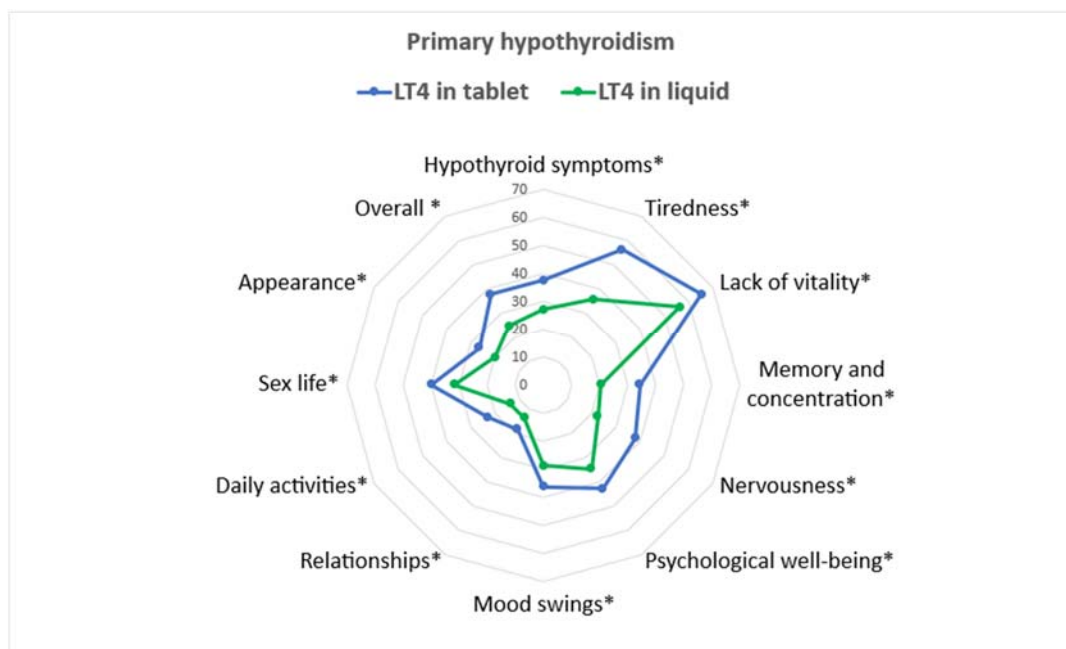

(a) \*,  $P < 0.05$ .

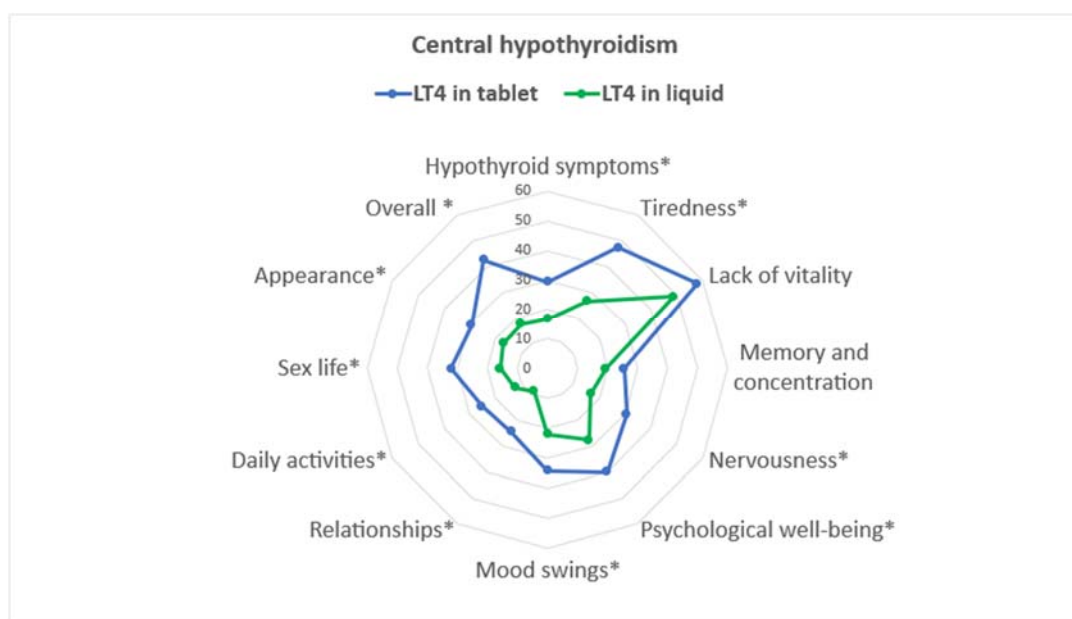

(b) \*,  $P < 0.05$ .

**Figure S1.** Spider plots based on data summarized in table 2 for better visualization: changes in QoL in patients with PH (a) and CH (b) after 8 weeks of liquid LT4 therapy. The indicated area is inversely proportional to the QoL (the smaller area the higher QoL).
